# Supplementary material for: A Retrospective Dosimetric Study of Radiotherapy Patients with Left-Sided Breast Cancer; Patient Selection Criteria for Deep Inspiration Breath Hold Technique
Source: MDPI journal article supplement (doi:10.3390/cancers11020259), 2019-02-22
Supplement: s1 [file s1]

# **Supplementary Materials: A Retrospective Dosimetric Study of Radiotherapy Patients with Left-Sided Breast Cancer; Patient Selection Criteria for Deep Inspiration Breath Hold Technique**

**Mikaela Dell'Oro, Eileen Giles, Amy Sharkey, Martin Borg, Caroline Connell and Eva Bezak**

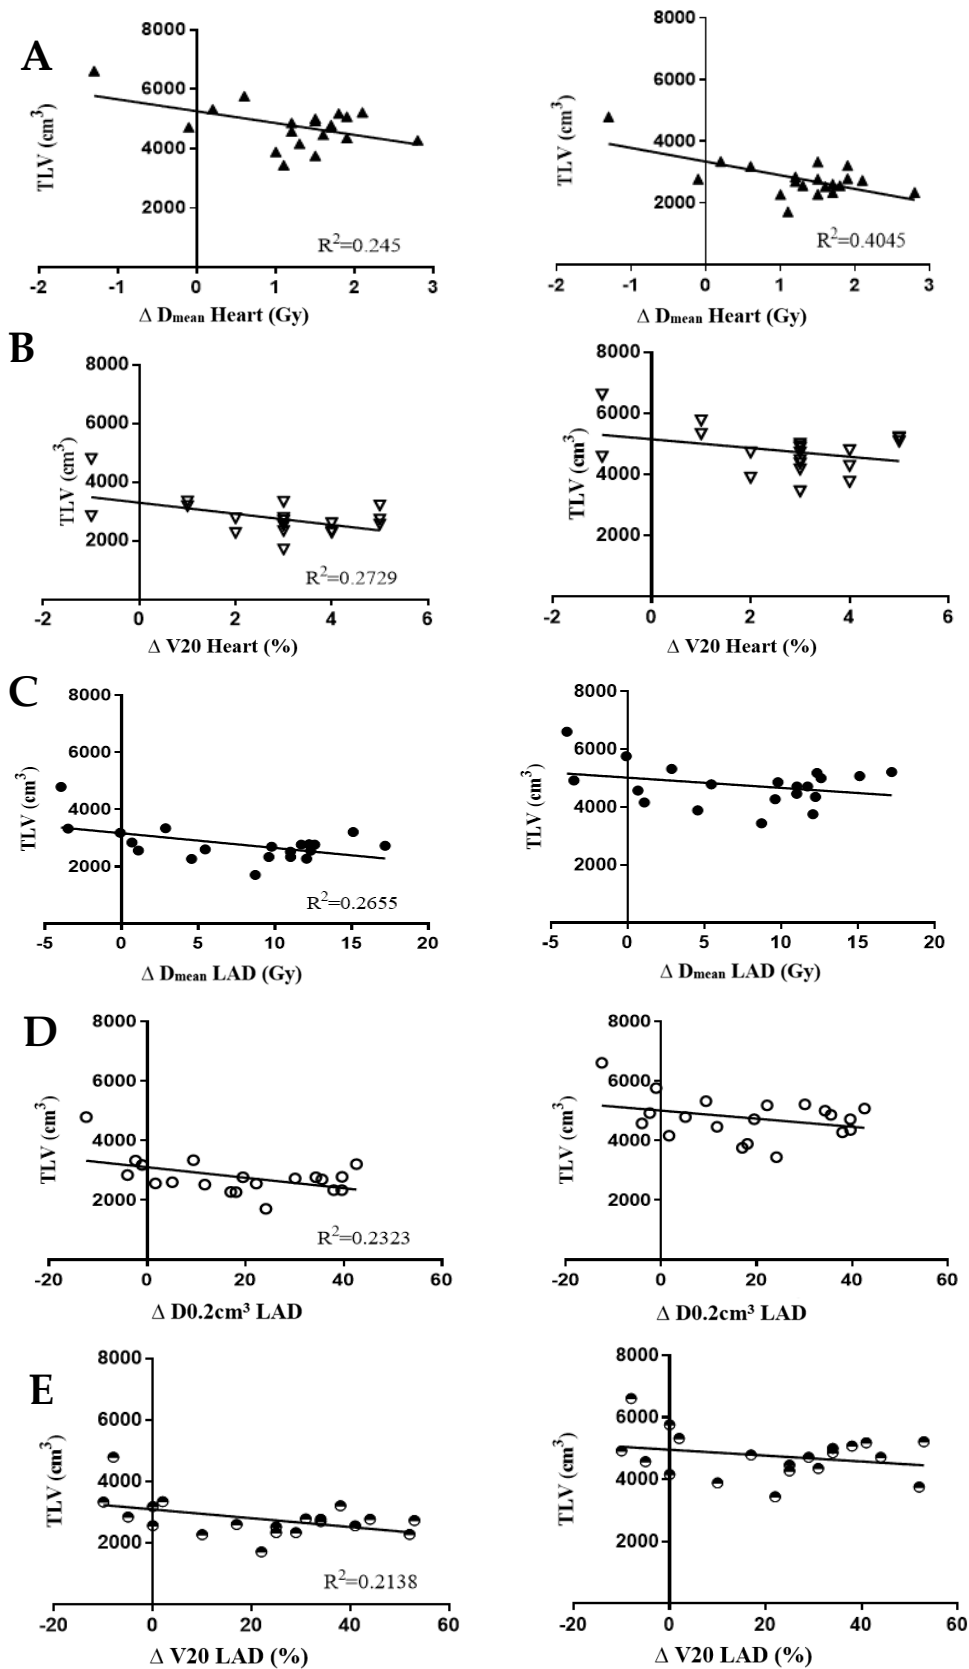

**Figure S1.** Reduction in dosimetric parameters correlated with patient anatomical parameters. (A) Correlation between the mean heart dose difference ( $\Delta D_{\text{mean}}$ ) and total lung volume (TLV) for CT<sub>DIBH</sub> (left) and CT<sub>FB</sub> (right) plans. (B) Correlation between the difference in volume of the heart receiving 20 Gy ( $\Delta V_{20}$ ) and total lung volume (TLV) for CT<sub>FB</sub> (left) and CT<sub>DIBH</sub> (right) plans. (C) Correlation between the mean LAD dose difference ( $\Delta D_{\text{mean}}$ ) and total lung volume (TLV) for CT<sub>FB</sub> (left) and

CT<sub>DIBH</sub> (right) plans. (D) Correlation between the difference in dose received by 0.2 cm<sup>3</sup> of the LAD ( $\Delta D_{0.2cm^3}$ ) and total lung volume (TLV) for CT<sub>FB</sub> (left) and CT<sub>DIBH</sub> (right) plans. (E) Correlation between the difference in the LAD volume receiving 20 Gy ( $\Delta V_{20}$ ) and total lung volume (TLV) for CT<sub>FB</sub> (left) and CT<sub>DIBH</sub> (right) plans.

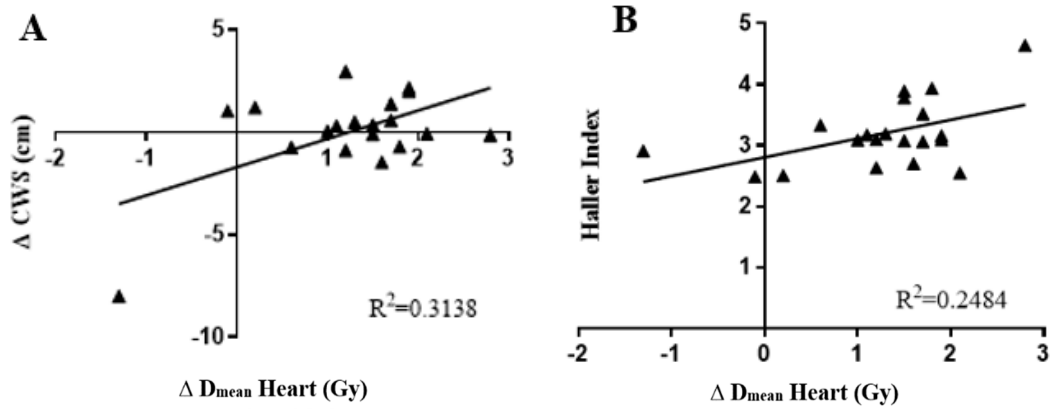

**Figure S2.** (A) Linear regression of the mean heart dose difference ( $\Delta D_{mean}$ ) and chest wall separation difference ( $\Delta CWS$ ) between CT<sub>FB</sub> and CT<sub>DIBH</sub> plans. (B) Linear regression of the mean heart dose difference ( $\Delta D_{mean}$ ) and Haller Index.

**Table S1.** Summary of reduction in dosimetric parameters correlated with patient anatomical parameters.

|       |                             | $\Delta$ CLD | CWS in CT <sub>FB</sub> Plan | $\Delta$ CWS | MHD in CT <sub>FB</sub> Plan | Haller Index | TLV in CT <sub>DIBH</sub> Plan | TLV in CT <sub>FB</sub> Plan |
|-------|-----------------------------|--------------|------------------------------|--------------|------------------------------|--------------|--------------------------------|------------------------------|
| Heart | $\Delta D_{\text{mean}}$    |              |                              | 0.3138*      | 0.397*                       | 0.2484*      | 0.245*                         | 0.4045*                      |
|       | $\Delta V_{10}$             | 0.2906*      |                              |              |                              |              |                                |                              |
|       | $\Delta V_{20}$             |              | 0.2047*                      |              |                              |              |                                | 0.2729*                      |
|       | $\Delta V_{25}$             |              |                              |              |                              |              |                                |                              |
|       | $\Delta V_{30}$             |              |                              |              |                              |              |                                |                              |
| LAD   | $\Delta D_{\text{mean}}$    |              | 0.2799*                      |              |                              |              |                                | 0.2655*                      |
|       | $\Delta D_{0.2\text{cm}^3}$ |              |                              |              |                              |              |                                | 0.2323*                      |
|       | $\Delta V_{20}$             |              | 0.3146*                      |              |                              |              |                                | 0.2138*                      |

Key: \*Significant difference irrespective of magnitude. Abbreviations:  $\Delta$ : relative reduction; CLD: central lung distance; MHD: maximum heart distance; CWS: chest wall separation; TLV; total lung volume.

**Treatment scheme in South Australia at the time of this study**

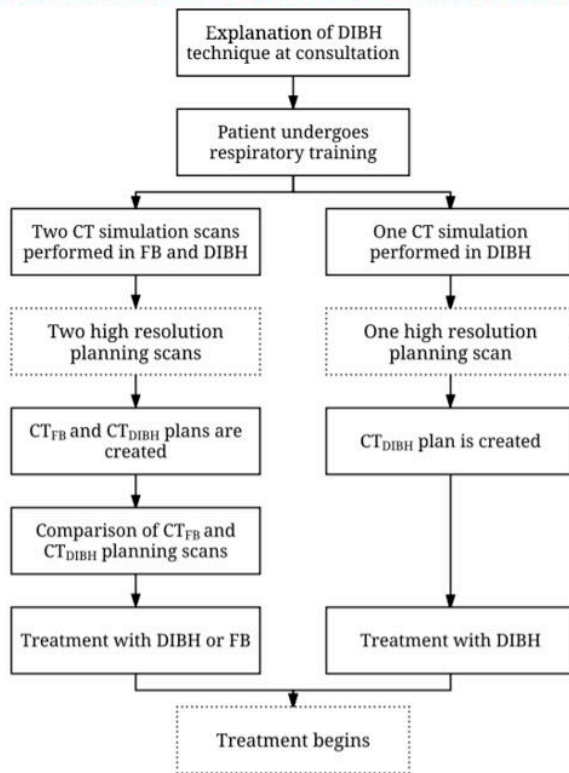

**Potential treatment scheme**

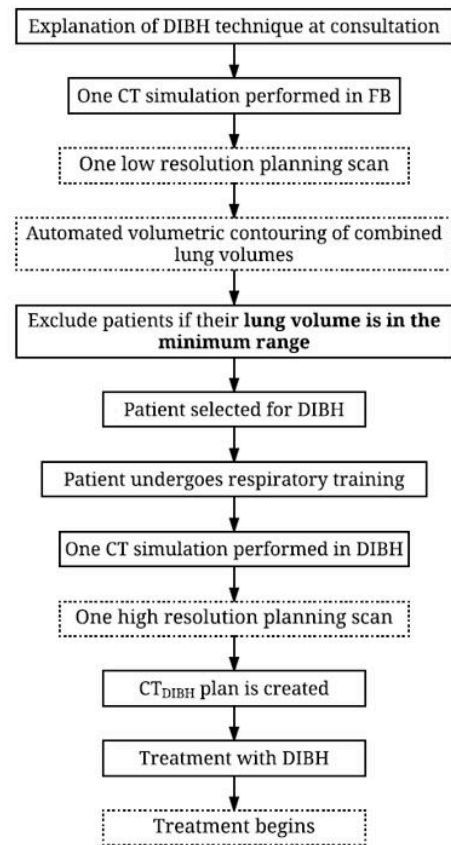

**Figure S3.** Potential treatment scheme compared the treatment scheme in South Australia at the time of this study.
